# Supplementary material for: Task specific ionic liquids as polarity shifting additives of common organic solvents
Source: Royal Society of Chemistry journal article supplement (doi:10.1039/c4nj00781f), 2014-01-01
Supplement: c4nj00781f1.pdf [file c4nj00781f1.pdf]

**Table 1** Effects in polarity of the addition of ionic liquids to acetonitrile.

| Mixture (ACN + RTIL) <sup>a</sup>           | Volume RTIL (μL) | $X_{RTIL/ACN} \times 10^{-4b}$ | $\mu_{RTIL/Betaine}^c$ | Wavelength (nm) <sup>d</sup> | $E_T(30)^e$ | $E_T^N f$ |
|---------------------------------------------|------------------|--------------------------------|------------------------|------------------------------|-------------|-----------|
| ACN                                         | -                | -                              | -                      | 626.1                        | 45.67       | 0.462     |
| [N <sub>1,8,8,8</sub> ][Cl]                 | 2                | 0.98                           | 4.48                   | 626.0                        | 45.67       | 0.462     |
|                                             | 4                | 1.97                           | 8.96                   | 625.9                        | 45.68       | 0.462     |
|                                             | 6                | 2.96                           | 13.44                  | 624.8                        | 45.76       | 0.465     |
|                                             | 10               | 4.94                           | 22.41                  | 624.4                        | 45.79       | 0.466     |
| [N <sub>1,8,8,8</sub> ][DCA]                | 2                | 0.89                           | 4.04                   | 624.5                        | 45.78       | 0.466     |
|                                             | 4                | 1.78                           | 8.08                   | 624.5                        | 45.78       | 0.465     |
|                                             | 6                | 2.67                           | 12.12                  | 624.4                        | 45.79       | 0.466     |
|                                             | 10               | 4.45                           | 20.20                  | 623.1                        | 45.89       | 0.469     |
| [P <sub>6,6,6,14</sub> ][Cl]                | 2                | 0.74                           | 3.35                   | 624.8                        | 45.76       | 0.465     |
|                                             | 4                | 1.48                           | 6.71                   | 624.7                        | 45.77       | 0.465     |
|                                             | 6                | 2.22                           | 10.06                  | 624.3                        | 45.80       | 0.466     |
| [P <sub>6,6,6,14</sub> ][BF <sub>4</sub> ]  | 2                | 0.71                           | 3.22                   | 626.1                        | 45.67       | 0.462     |
|                                             | 4                | 1.42                           | 6.43                   | 626.1                        | 45.67       | 0.462     |
|                                             | 6                | 2.13                           | 9.65                   | 625.0                        | 45.75       | 0.464     |
|                                             | 10               | 3.54                           | 16.08                  | 624.7                        | 45.77       | 0.465     |
| [P <sub>6,6,6,14</sub> ][NTf <sub>2</sub> ] | 2                | 0.60                           | 2.71                   | 624.7                        | 45.77       | 0.465     |
|                                             | 4                | 1.19                           | 5.42                   | 624.9                        | 45.75       | 0.465     |
|                                             | 6                | 1.79                           | 8.14                   | 625.5                        | 45.71       | 0.463     |
|                                             | 10               | 2.99                           | 13.56                  | 625.4                        | 45.72       | 0.464     |
| [P <sub>6,6,6,14</sub> ][DCA]               | 2                | 0.71                           | 3.23                   | 626.1                        | 45.67       | 0.462     |
|                                             | 4                | 1.42                           | 6.46                   | 626.1                        | 45.67       | 0.462     |
|                                             | 6                | 2.13                           | 9.69                   | 626.0                        | 45.67       | 0.462     |
|                                             | 10               | 3.56                           | 16.15                  | 624.7                        | 45.77       | 0.465     |
| [EMIM][NTf <sub>2</sub> ]                   | 2                | 1.69                           | 7.69                   | 537.5                        | 53.19       | 0.694     |
|                                             | 4                | 3.39                           | 15.37                  | 531.9                        | 53.76       | 0.712     |
|                                             | 6                | 5.08                           | 23.06                  | 531.5                        | 53.79       | 0.713     |
|                                             | 10               | 8.47                           | 38.43                  | 530.8                        | 53.87       | 0.715     |
| [EMIM][EtSO <sub>4</sub> ]                  | 2                | 2.27                           | 10.32                  | 625.9                        | 45.68       | 0.462     |
|                                             | 4                | 4.55                           | 20.65                  | 623.1                        | 45.89       | 0.469     |
|                                             | 6                | 6.82                           | 30.97                  | 621.2                        | 46.02       | 0.473     |
|                                             | 10               | 1.14                           | 51.61                  | 617.2                        | 46.33       | 0.482     |
| [EMIM][MDEGSO <sub>4</sub> ]                | 2                | 1.62                           | 7.36                   | 623.9                        | 45.83       | 0.467     |
|                                             | 4                | 3.24                           | 14.72                  | 621.7                        | 45.99       | 0.472     |
|                                             | 6                | 4.87                           | 22.09                  | 618.3                        | 46.25       | 0.480     |
|                                             | 10               | 8.11                           | 36.81                  | 615.0                        | 46.49       | 0.487     |
| [C <sub>10</sub> MIM][BF <sub>4</sub> ]     | 2                | 1.51                           | 6.84                   | 577.0                        | 49.55       | 0.582     |
|                                             | 4                | 3.02                           | 13.69                  | 570.9                        | 50.08       | 0.598     |
|                                             | 6                | 4.52                           | 20.53                  | 561.9                        | 50.88       | 0.623     |
|                                             | 8                | 6.03                           | 27.38                  | 557.9                        | 51.25       | 0.634     |
| [C <sub>2</sub> OHMIM][PF <sub>6</sub> ]    | 2                | 2.36                           | 10.73                  | 570.3                        | 50.14       | 0.600     |
|                                             | 4                | 4.73                           | 21.46                  | 564.0                        | 50.70       | 0.617     |
|                                             | 6                | 7.09                           | 32.19                  | 557.4                        | 51.29       | 0.636     |
|                                             | 10               | 11.82                          | 53.66                  | 552.3                        | 51.77       | 0.650     |
| [C <sub>2</sub> OHMIM][BF <sub>4</sub> ]    | 2                | 2.66                           | 12.06                  | 624.4                        | 45.79       | 0.466     |
|                                             | 4                | 5.31                           | 24.12                  | 623.0                        | 45.90       | 0.469     |
|                                             | 6                | 7.97                           | 36.18                  | 621.4                        | 46.01       | 0.473     |
|                                             | 10               | 13.29                          | 60.31                  | 617.8                        | 46.28       | 0.481     |
| [(C <sub>6</sub> ) <sub>4</sub> DMG][Cl]    | 0.02             | 0.01                           | 0.04                   | 626.1                        | 45.67       | 0.462     |
|                                             | 0.07             | 0.03                           | 0.14                   | 626.3                        | 45.65       | 0.462     |
|                                             | 0.2              | 0.09                           | 0.39                   | 626.1                        | 45.66       | 0.462     |
|                                             | 0.3              | 0.13                           | 0.58                   | 625.9                        | 45.68       | 0.462     |
|                                             | 0.4              | 0.17                           | 0.77                   | 625.1                        | 45.74       | 0.464     |
|                                             | 0.5              | 0.21                           | 0.96                   | 624.7                        | 45.77       | 0.465     |
|                                             | 0.6              | 0.26                           | 1.16                   | 624.5                        | 45.78       | 0.465     |

<sup>a</sup> All ionic liquids were added pure to acetonitrile, with the exception of [(C<sub>6</sub>)<sub>4</sub>DMG][Cl], which was first diluted in acetonitrile and then added to the solution with Reichardt's dye. <sup>b</sup> Mole fraction of RTIL in acetonitrile. <sup>c</sup> Number of moles of RTIL per mole of betaine dye. <sup>d</sup> Wavelength refers to the value obtained after addition of the indicated quantity of RTIL. <sup>e</sup> Calculated by eq 1. <sup>f</sup> Calculated by equation 2.

**Table 2** Effects in polarity of the addition of ionic liquids to ethanol.

| Mixture<br>(EtOH + RTIL) <sup>a</sup><br>EtOH | Volume<br>RTIL ( $\mu$ L) | $X_{\text{RTIL/EtOH}} \times 10^{-4}$ <sup>b</sup> | $\mu_{\text{RTIL/Betaine}}$ <sup>c</sup> | Wavelength<br>(nm) <sup>d</sup> | $E_T(30)$ <sup>e</sup> | $E_{Tf}^N$ |
|-----------------------------------------------|---------------------------|----------------------------------------------------|------------------------------------------|---------------------------------|------------------------|------------|
|                                               | -                         | -                                                  | -                                        | 550.5                           | 51.94                  | 0.655      |
| [EMIM][EtSO <sub>4</sub> ]                    | 2                         | 2.54                                               | 10.32                                    | 548.5                           | 52.13                  | 0.661      |
|                                               | 4                         | 5.08                                               | 20.65                                    | 548.5                           | 52.13                  | 0.661      |
|                                               | 6                         | 7.63                                               | 30.97                                    | 547.5                           | 52.22                  | 0.664      |
| [EMIM][MDEGSO <sub>4</sub> ]                  | 2                         | 1.81                                               | 7.36                                     | 547.5                           | 52.22                  | 0.664      |
|                                               | 4                         | 3.63                                               | 14.72                                    | 549.5                           | 52.03                  | 0.658      |
|                                               | 6                         | 5.44                                               | 22.09                                    | 546.5                           | 52.32                  | 0.667      |
| [BMIM][PF <sub>6</sub> ]                      | 2                         | 2.33                                               | 9.44                                     | 548.5                           | 52.13                  | 0.661      |
|                                               | 4                         | 4.65                                               | 18.89                                    | 548.5                           | 52.13                  | 0.661      |
|                                               | 6                         | 6.98                                               | 28.33                                    | 546.5                           | 52.32                  | 0.667      |
| [BMIM][BF <sub>4</sub> ]                      | 2                         | 2.41                                               | 9.78                                     | 548.5                           | 52.13                  | 0.661      |
|                                               | 4                         | 4.81                                               | 19.55                                    | 549.5                           | 52.03                  | 0.658      |
|                                               | 6                         | 7.22                                               | 29.33                                    | 547.5                           | 52.22                  | 0.664      |
|                                               | 10                        | 12.04                                              | 48.88                                    | 545.6                           | 52.41                  | 0.670      |
|                                               | 12                        | 14.44                                              | 58.66                                    | 547.0                           | 52.27                  | 0.666      |
|                                               | 18                        | 21.67                                              | 87.99                                    | 545.0                           | 52.46                  | 0.672      |
|                                               | 20                        | 24.07                                              | 97.77                                    | 542.3                           | 52.73                  | 0.680      |
| [BMIM][NTf <sub>2</sub> ]                     | 2                         | 1.68                                               | 6.83                                     | 549.0                           | 52.08                  | 0.660      |
|                                               | 4                         | 3.36                                               | 13.66                                    | 549.0                           | 52.08                  | 0.660      |
|                                               | 6                         | 5.05                                               | 20.49                                    | 548.5                           | 52.13                  | 0.661      |
|                                               | 8                         | 6.73                                               | 27.33                                    | 548.0                           | 52.17                  | 0.663      |
|                                               | 10                        | 8.41                                               | 34.16                                    | 546.0                           | 52.36                  | 0.669      |
|                                               | 12                        | 10.09                                              | 40.99                                    | 546.0                           | 52.36                  | 0.669      |
|                                               | 14                        | 15.14                                              | 61.48                                    | 544.0                           | 52.56                  | 0.675      |
| [BMIM][DCA]                                   | 2                         | 2.51                                               | 10.21                                    | 549.5                           | 52.03                  | 0.658      |
|                                               | 4                         | 5.03                                               | 20.42                                    | 549.5                           | 52.03                  | 0.658      |
|                                               | 6                         | 7.54                                               | 30.63                                    | 548.5                           | 52.13                  | 0.661      |
|                                               | 12                        | 15.08                                              | 61.25                                    | 546.0                           | 52.36                  | 0.669      |
|                                               | 18                        | 22.62                                              | 91.88                                    | 545.0                           | 52.46                  | 0.672      |
| [C <sub>8</sub> MIM][PF <sub>6</sub> ]        | 2                         | 1.76                                               | 7.16                                     | 550.5                           | 51.94                  | 0.655      |
|                                               | 4                         | 3.53                                               | 14.32                                    | 549.5                           | 52.03                  | 0.658      |
|                                               | 6                         | 5.29                                               | 21.47                                    | 548.0                           | 52.17                  | 0.663      |
| [C <sub>8</sub> MIM][BF <sub>4</sub> ]        | 6                         | 5.73                                               | 23.28                                    | 548.5                           | 52.13                  | 0.661      |
|                                               | 12                        | 11.46                                              | 46.56                                    | 547.0                           | 52.27                  | 0.666      |
|                                               | 18                        | 17.20                                              | 69.83                                    | 546.5                           | 52.32                  | 0.667      |
| [C <sub>10</sub> MIM][BF <sub>4</sub> ]       | 2                         | 1.69                                               | 6.84                                     | 548.5                           | 52.13                  | 0.661      |
|                                               | 4                         | 3.37                                               | 13.69                                    | 546.5                           | 52.32                  | 0.667      |
|                                               | 6                         | 5.06                                               | 20.53                                    | 545.5                           | 52.41                  | 0.670      |
|                                               | 8                         | 6.74                                               | 27.38                                    | 545.5                           | 52.41                  | 0.670      |
| [C <sub>2</sub> OHMIM][BF <sub>4</sub> ]      | 3                         | 5.94                                               | 24.12                                    | 551.0                           | 51.89                  | 0.654      |
|                                               | 6                         | 8.91                                               | 36.18                                    | 547.0                           | 52.27                  | 0.666      |
|                                               | 8                         | 11.88                                              | 48.25                                    | 546.0                           | 52.36                  | 0.669      |
|                                               | 9                         | 14.85                                              | 60.31                                    | 544.0                           | 52.56                  | 0.675      |
|                                               | 12                        | 17.82                                              | 72.37                                    | 542.0                           | 52.75                  | 0.681      |

<sup>a</sup> All ionic liquids were added pure to ethanol <sup>b</sup> Mole fraction of RTIL in ethanol. <sup>c</sup> Number of moles of RTIL per mole of betaine dye. <sup>d</sup> Wavelength refers to the value obtained after addition of the indicated quantity of RTIL. <sup>e</sup> Calculated by eq 1. <sup>f</sup> Calculated by equation 2.

**Table 3** Effects in polarity of the addition of ionic liquids to tetrahydrofuran, chloroform and isopropanol.

|                                        | Mixture<br>(Solvent + RTIL)             | Volume<br>RTIL ( $\mu\text{L}$ )        | $X_{\text{RTIL/Solvent}} \times 10^{-4}$ | $\mu_{\text{RTIL/Betaine}}$ | Wavelength<br>(nm) | $E_T(30)$      | $E_T^N$ |       |       |
|----------------------------------------|-----------------------------------------|-----------------------------------------|------------------------------------------|-----------------------------|--------------------|----------------|---------|-------|-------|
| Tetrahydrofuran                        | THF                                     | -                                       | -                                        | -                           | 759.0              | 37.67          | 0.215   |       |       |
|                                        | [BMIM][PF <sub>6</sub> ]                | 2                                       | 3.23                                     | 9.44                        | 647.1              | 44.19          | 0.416   |       |       |
|                                        |                                         | 4                                       | 6.47                                     | 18.89                       | 640.7              | 44.62          | 0.430   |       |       |
|                                        |                                         | 6                                       | 9.70                                     | 28.33                       | 638.2              | 44.80          | 0.435   |       |       |
|                                        | [BMIM][BF <sub>4</sub> ]                | 2                                       | 3.35                                     | 9.78                        | 660.3              | 43.30          | 0.389   |       |       |
|                                        |                                         | 4                                       | 6.70                                     | 19.55                       | 660.1              | 43.31          | 0.389   |       |       |
|                                        |                                         | 6                                       | 10.05                                    | 29.33                       | 651.4              | 43.89          | 0.407   |       |       |
|                                        |                                         | 8                                       | 13.39                                    | 39.11                       | 644.3              | 44.38          | 0.422   |       |       |
|                                        |                                         | 10                                      | 16.74                                    | 48.88                       | 638.5              | 44.78          | 0.434   |       |       |
|                                        |                                         | [C <sub>8</sub> MIM][PF <sub>6</sub> ]  | 2                                        | 2.45                        | 7.16               | 655.4          | 43.62   | 0.399 |       |
|                                        | 4                                       |                                         | 4.90                                     | 14.32                       | 647.7              | 44.15          | 0.415   |       |       |
|                                        | 6                                       |                                         | 7.35                                     | 21.47                       | 643.3              | 44.45          | 0.424   |       |       |
|                                        | Chloroform                              | [C <sub>10</sub> MIM][BF <sub>4</sub> ] | 8                                        | 9.81                        | 28.63              | 641.3          | 44.58   | 0.429 |       |
|                                        |                                         |                                         | -                                        | -                           | -                  | forms emulsion | 703.2   | 40.66 | 0.307 |
|                                        |                                         |                                         | -                                        | -                           | -                  | forms emulsion | -       | -     | -     |
| [BMIM][PF <sub>6</sub> ]               |                                         | 2                                       | 3.32                                     | 9.78                        | 671.3              | 42.59          | 0.367   |       |       |
|                                        |                                         | 4                                       | 6.65                                     | 19.55                       | 667.0              | 42.87          | 0.376   |       |       |
|                                        |                                         | 6                                       | 9.97                                     | 29.33                       | 654.0              | 43.72          | 0.402   |       |       |
|                                        |                                         | 8                                       | 13.30                                    | 39.11                       | 644.7              | 44.35          | 0.421   |       |       |
|                                        |                                         | 10                                      | 16.62                                    | 48.88                       | 640.9              | 44.61          | 0.429   |       |       |
|                                        |                                         | 15                                      | 24.93                                    | 73.33                       | 632.5              | 45.20          | 0.448   |       |       |
| [C <sub>8</sub> MIM][PF <sub>6</sub> ] |                                         | 2                                       | 2.43                                     | 7.16                        | 689.5              | 41.47          | 0.332   |       |       |
|                                        |                                         | 4                                       | 4.87                                     | 14.32                       | 660.1              | 43.31          | 0.389   |       |       |
|                                        |                                         | 6                                       | 7.30                                     | 21.47                       | 649.5              | 44.02          | 0.411   |       |       |
|                                        |                                         | 8                                       | 9.73                                     | 28.63                       | 642.2              | 44.52          | 0.427   |       |       |
|                                        |                                         | 10                                      | 12.17                                    | 35.79                       | 634.8              | 45.04          | 0.443   |       |       |
|                                        |                                         | 15                                      | 18.25                                    | 53.69                       | 627.4              | 45.57          | 0.459   |       |       |
| Isopropanol                            | [C <sub>10</sub> MIM][BF <sub>4</sub> ] | -                                       | -                                        | -                           | forms emulsion     | 593.0          | 48.21   | 0.541 |       |
|                                        |                                         | i-PrOH                                  | -                                        | -                           | -                  | 588.3          | 48.60   | 0.552 |       |
|                                        |                                         | [BMIM][PF <sub>6</sub> ]                | 2                                        | 3.05                        | 9.44               | 588.3          | 48.60   | 0.552 |       |
|                                        |                                         | 4                                       | 6.10                                     | 18.89                       | 585.9              | 48.80          | 0.559   |       |       |
|                                        |                                         | 6                                       | 9.15                                     | 28.33                       | 582.3              | 49.10          | 0.568   |       |       |
|                                        |                                         | [BMIM][BF <sub>4</sub> ]                | 2                                        | 3.16                        | 9.78               | 590.5          | 48.42   | 0.547 |       |
|                                        | 4                                       |                                         | 6.31                                     | 19.55                       | 588.2              | 48.61          | 0.553   |       |       |
|                                        | 6                                       |                                         | 9.47                                     | 29.33                       | 583.5              | 49.00          | 0.565   |       |       |
|                                        |                                         | 10                                      | 15.79                                    | 48.88                       | 578.4              | 49.43          | 0.578   |       |       |
|                                        |                                         | [C <sub>8</sub> MIM][PF <sub>6</sub> ]  | 2                                        | 2.31                        | 7.16               | 588.6          | 48.58   | 0.552 |       |
|                                        |                                         |                                         | 4                                        | 4.62                        | 14.32              | 584.6          | 48.91   | 0.562 |       |
|                                        | 6                                       |                                         | 6.93                                     | 21.47                       | 580.2              | 49.28          | 0.573   |       |       |
|                                        |                                         | 10                                      | 11.56                                    | 35.79                       | 575.8              | 49.66          | 0.585   |       |       |
|                                        |                                         | [C <sub>10</sub> MIM][BF <sub>4</sub> ] | 2                                        | 2.21                        | 6.84               | 587.3          | 48.68   | 0.555 |       |
|                                        |                                         |                                         | 4                                        | 4.42                        | 13.69              | 582.1          | 49.12   | 0.568 |       |
| 6                                      | 6.63                                    |                                         | 20.53                                    | 577.4                       | 49.52              | 0.581          |         |       |       |

<sup>a</sup> All ionic liquids were added pure to the solvent. <sup>b</sup> Mole fraction of RTIL in solvent. <sup>c</sup> Number of moles of RTIL per mole of betaine dye. <sup>d</sup> Wavelength refers to the value obtained after addition of the indicated quantity of RTIL. <sup>e</sup> Calculated by eq 1. <sup>f</sup> Calculated by equation 2. <sup>g</sup> Maximum value of water content measured by Karl Fischer titration.
